# Supplementary material for: Female reproductive Cancers burden and projection in China: a time-trend analysis and comparison with the United States, United Kingdom and global based on the global epidemiological data released in 2020
Source: Research Square preprint supplement (doi:10.21203/rs.3.rs-6424151/v1), 2025-05-19
Supplement: Supplementary file 1 [file 25d7d27dfc184ab875e4eafc.docx]

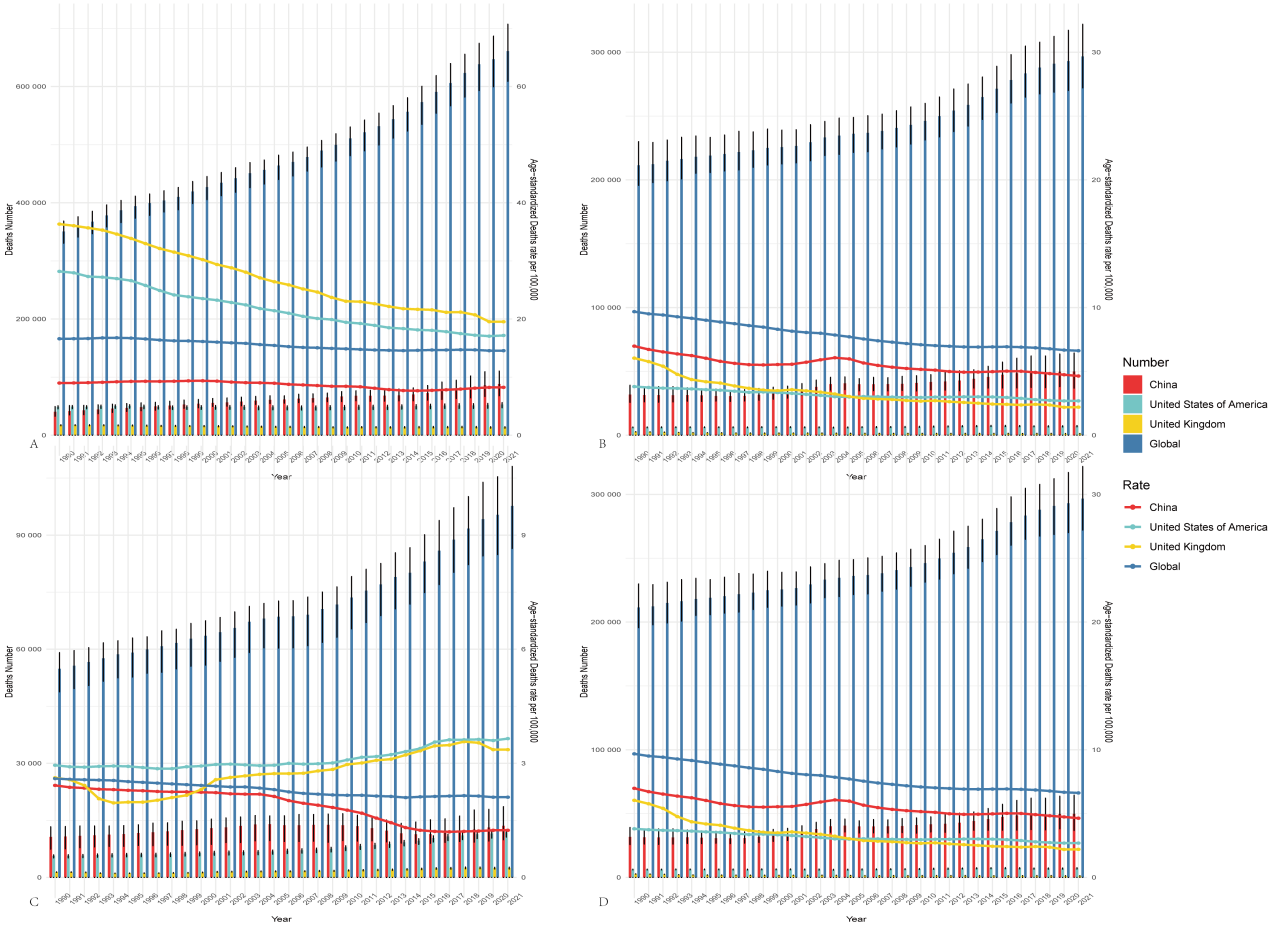


FIGURE S1 Death and ASMR per 100,000 population of selected types of cancers in China, United States of Amercia, United Kingdom, and global from 1990 to 2020. ASMR data in breast cancer (A), cervical cancer(B),uterine cancer(C)and ovarian cancer (D). The data used to generate this figure were from the GLOBOCAN 2021 database.


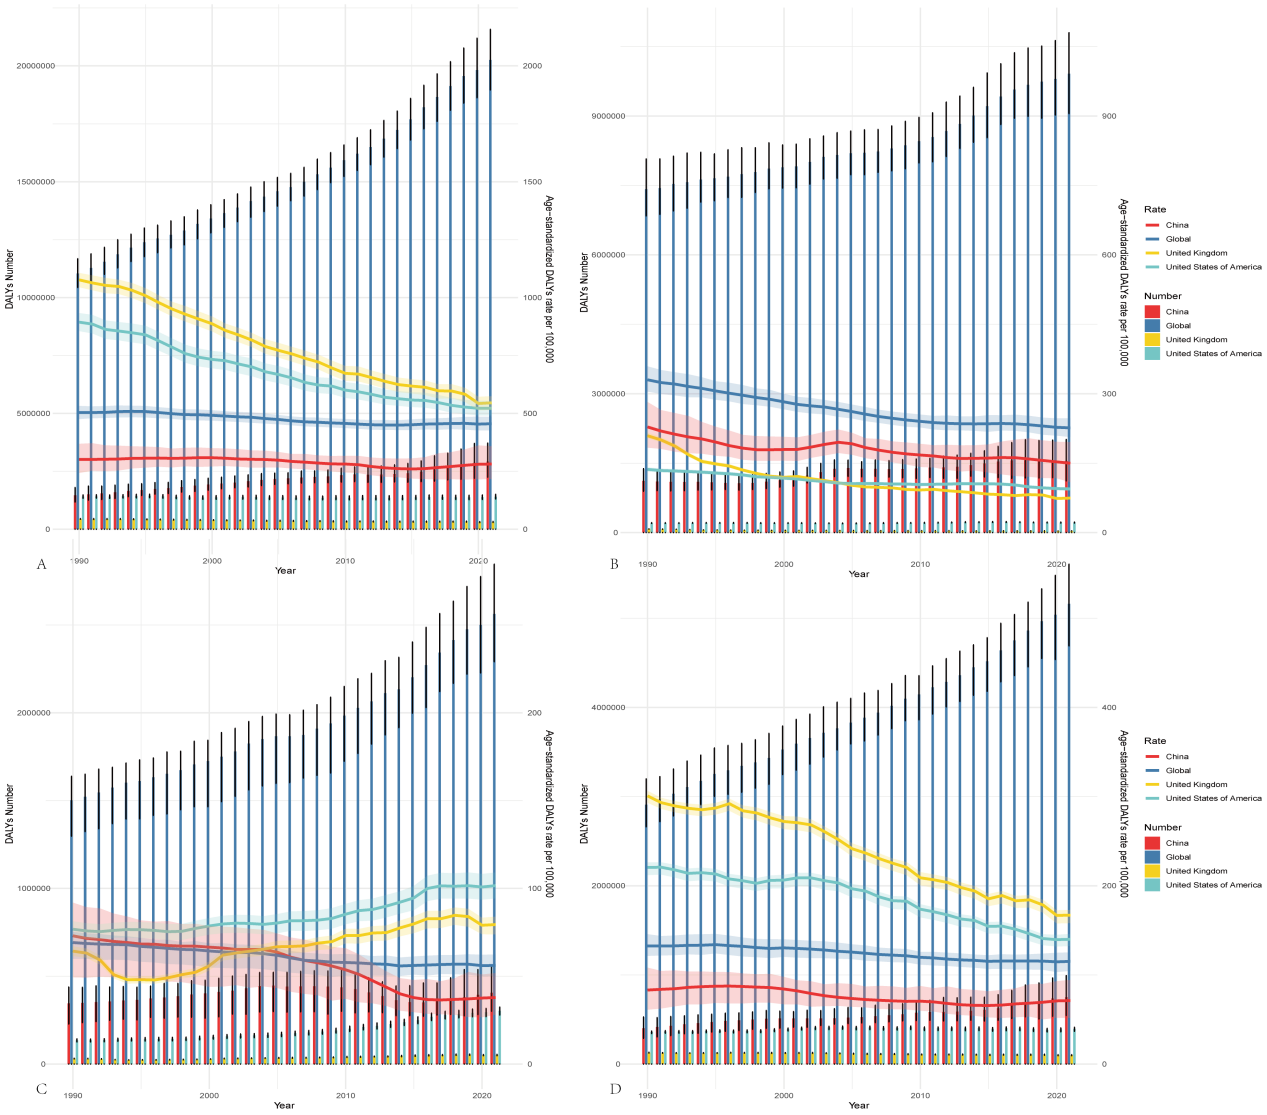


FIGURE S2 DALY and ASDR per 100,000 population of selected types of cancers in China, United States of Amercia, United Kingdom, and global from 1990 to 2020. ASDR data in breast cancer (A), cervical cancer(B),uterine cancer(C)and ovarian cancer (D). The data used to generate this figure were from the GLOBOCAN 2021 database.


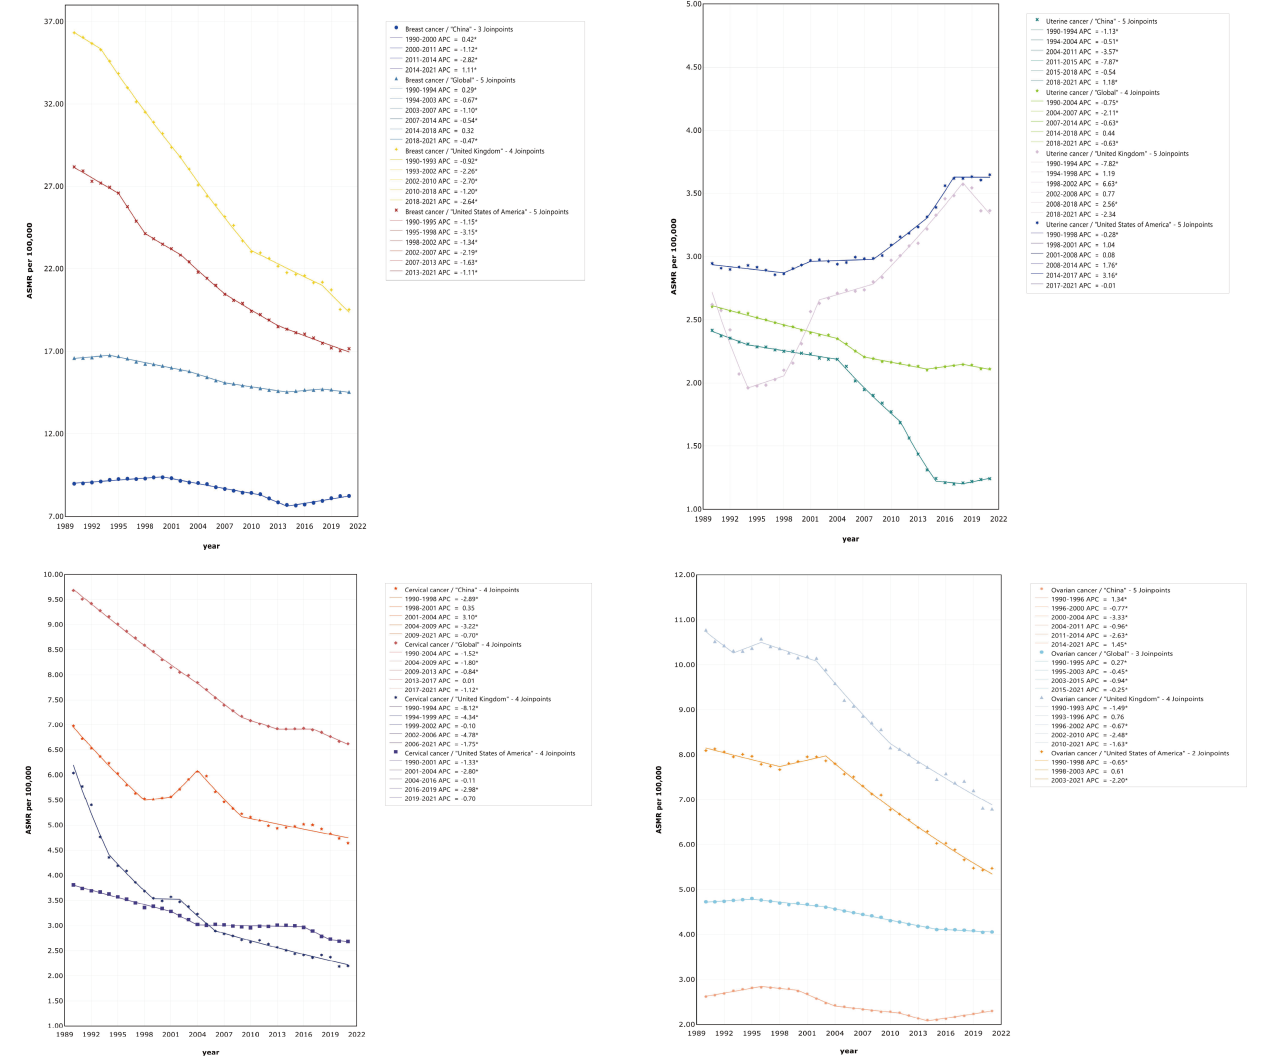


FIGURE S3 Trends in ASMR by cancer site of four female cancers in China, United States of Amercia, United Kingdom, and global. Abbreviations: ASMR, age-standardized rates of cancer death; APC, annual percent change.


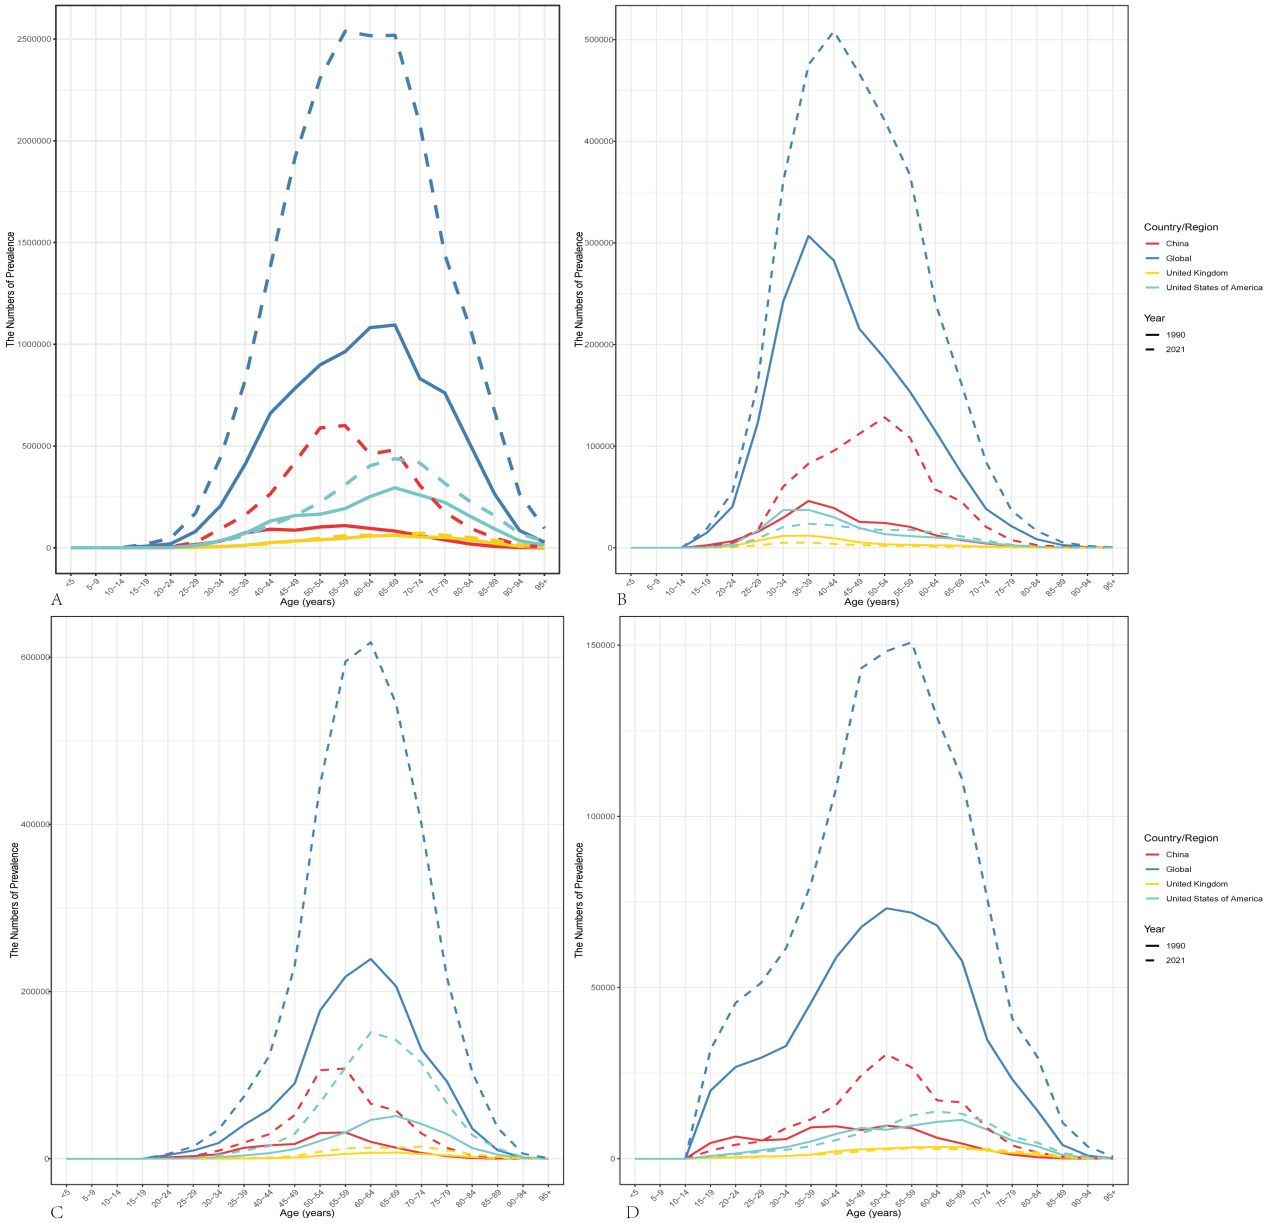


FIGURE S4 The cross-sectional (2021) and longitudinal trends (1990–2021) of prevalence number of female cancers throughout women of age. Prevalence number data in breast cancer (A), cervical cancer(B),uterine cancer(C)and ovarian cancer (D).


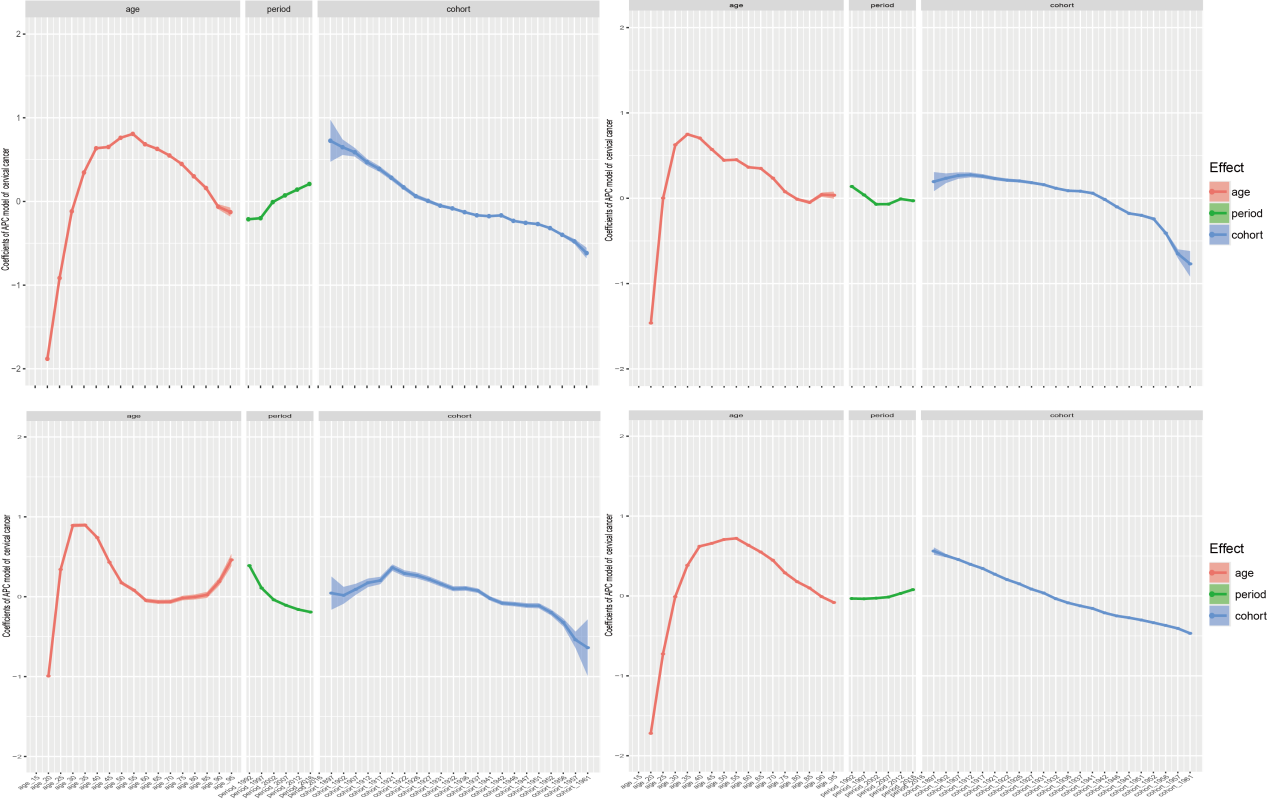


FIGURE S5 Age, period and birth cohort effects on cervical cancers.age:age effects are illustrated by the fitted longitudinal age-­specific rates for a given number of birth cohorts adjusted for period deviations.period: period effects are illustrated by the period relative risk of prevalence (prevalence rate ratio) and calculated as the ratio of age-­specific rates from 1992–1996 period to 2018–2021 period. cohort: Birth cohort effects are illustrated by the cohort relative risk of prevalence (prevalence rate ratio) and calculated as the ratio of age-­specific rates from 1897–1901 cohort to 1958-1961 cohort. The dots and shaded areas denote the prevalence rates or rate ratios and their corresponding 95% CIs. (A) China, (B) United States of Amercia, (C) United Kingdom,(D) global.


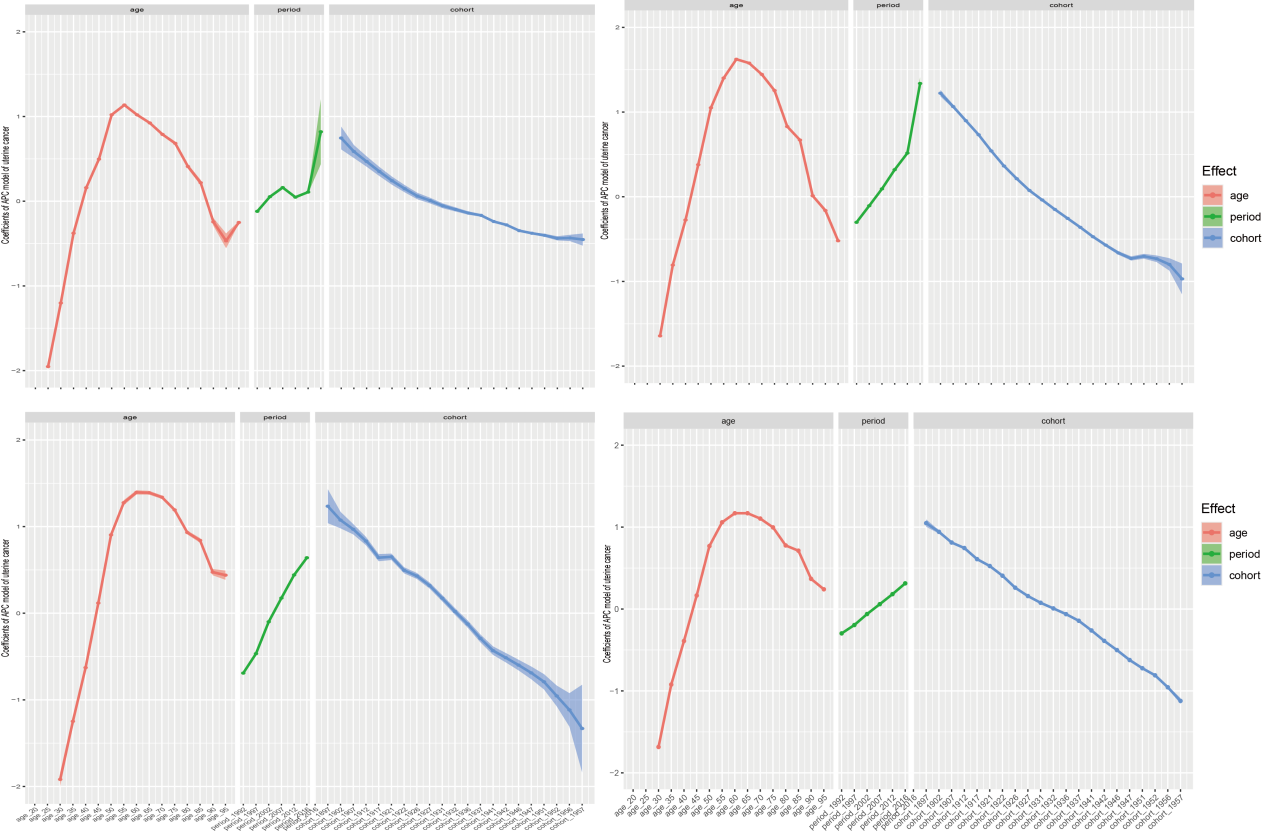


FIGURE S6 Age, period and birth cohort effects on uterine cancers.age:age effects are illustrated by the fitted longitudinal age-­specific rates for a given number of birth cohorts adjusted for period deviations.period: period effects are illustrated by the period relative risk of prevalence (prevalence rate ratio) and calculated as the ratio of age-­specific rates from 1992–1996 period to 2018–2021 period. cohort: Birth cohort effects are illustrated by the cohort relative risk of prevalence (prevalence rate ratio) and calculated as the ratio of age-­specific rates from 1897–1901 cohort to 1958-1961 cohort. The dots and shaded areas denote the prevalence rates or rate ratios and their corresponding 95% CIs. (A) China, (B) United States of Amercia, (C) United Kingdom,(D) global.


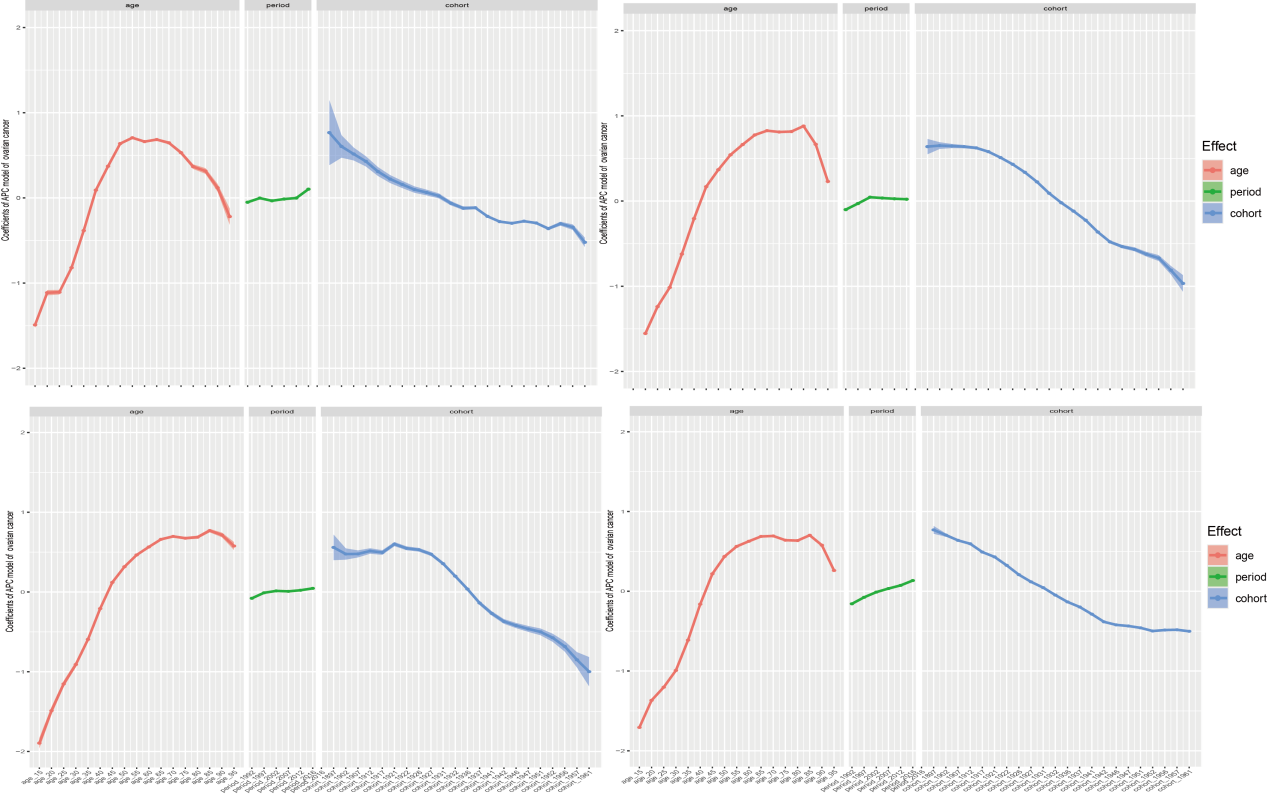


FIGURE S7 Age, period and birth cohort effects on ovarian cancers.age:age effects are illustrated by the fitted longitudinal age-­specific rates for a given number of birth cohorts adjusted for period deviations.period: period effects are illustrated by the period relative risk of prevalence (prevalence rate ratio) and calculated as the ratio of age-­specific rates from 1992–1996 period to 2018–2021 period. cohort: Birth cohort effects are illustrated by the cohort relative risk of prevalence (prevalence rate ratio) and calculated as the ratio of age-­specific rates from 1897–1901 cohort to 1958-1961 cohort. The dots and shaded areas denote the prevalence rates or rate ratios and their corresponding 95% CIs. (A) China, (B) United States of Amercia, (C) United Kingdom,(D) global.


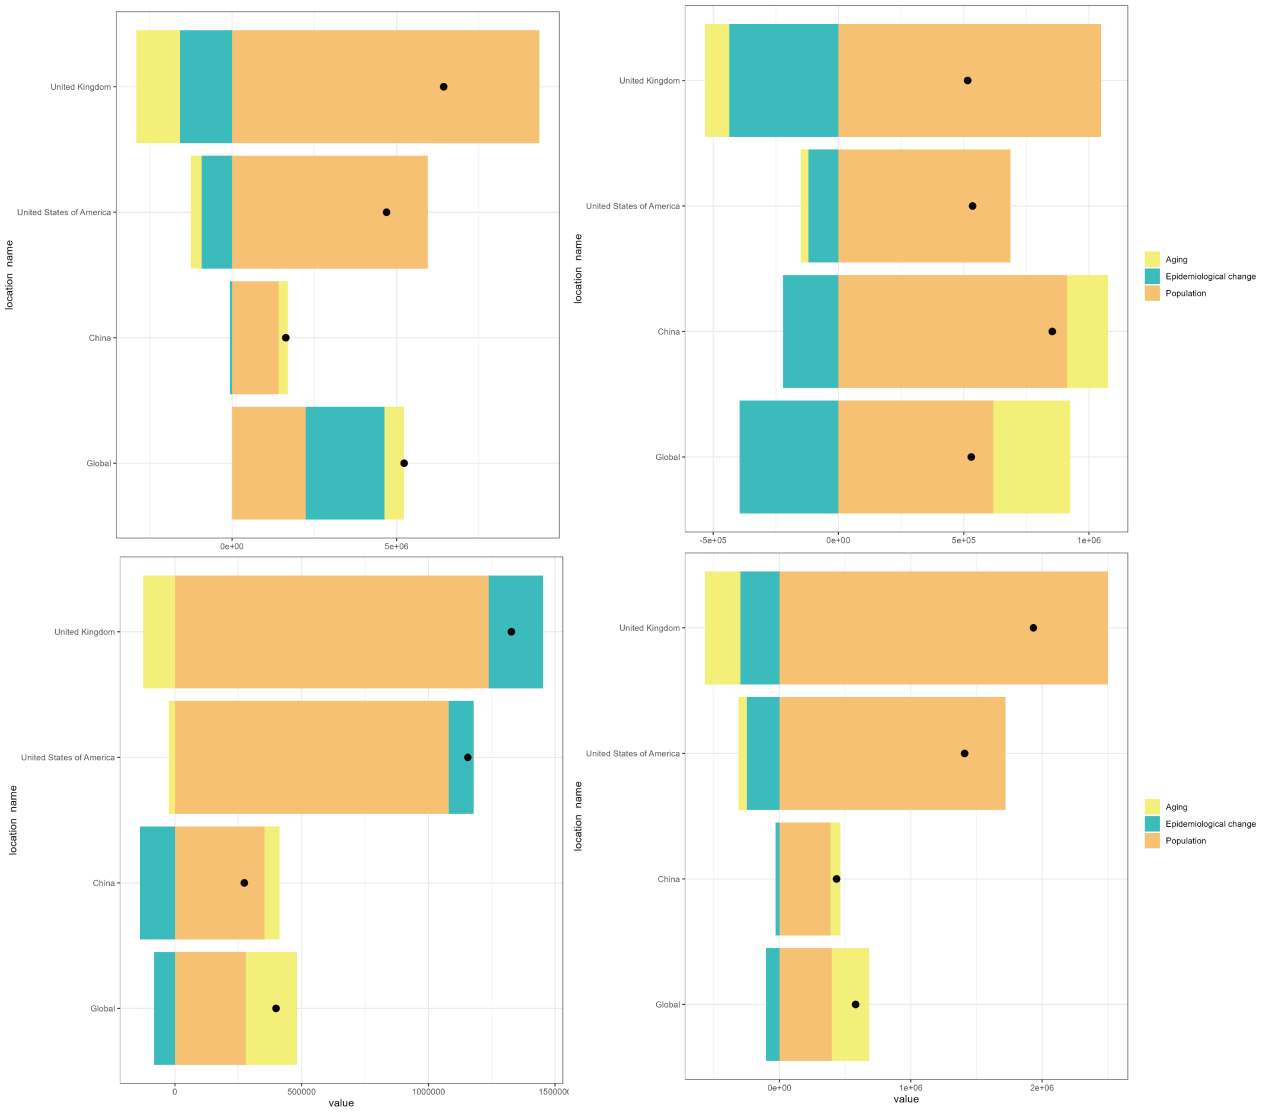


FIGURE S8 Decomposition analysis of death from 1990 to 2021 in breast cancer (A), cervical cancer(B),uterine cancer(C)and ovarian cancer (D)
