# Supplementary material for: Female reproductive Cancers burden and projection in China: a time-trend analysis and comparison with the United States, United Kingdom and global based on the global epidemiological data released in 2020
Source: Research Square preprint supplement (doi:10.21203/rs.3.rs-6424151/v1), 2025-05-19
Supplement: Supplementary file 2 [file 63bca1a07c1090b6b6b94471.xlsx]

## Sheet: Sheet1
Supplementary Table S1. 1990															Supplementary Table S1. 2021
Rank		China			US			UK			Worldwide				Rank		China			US			UK			Wordwide
	Tumor location	All-ages cases (95%CI)	Age-standardized rates per 100,000 people(95%CI)		All-ages cases (95%CI)	Age-standardized rates per 100,000 people(95%CI)		All-ages cases (95%CI)	Age-standardized rates per 100,000 people(95%CI)		All-ages cases (95%CI)	Age-standardized rates per 100,000 people(95%CI)				Tumor location	All-ages cases (95%CI)	Age-standardized rates per 100,000 people(95%CI)		All-ages cases (95%CI)	Age-standardized rates per 100,000 people(95%CI)		All-ages cases (95%CI)	Age-standardized rates per 100,000 people(95%CI)		All-ages cases (95%CI)	Age-standardized rates per 100,000 people(95%CI)
Deaths															Deaths
	Breast	40357 (32865,49187)	8.98 (7.35,10.88)		48806 (45525,50614)	28.19 (26.64,29.11)		17544 (16531,18037)	36.33 (34.7,37.19)		350577 (330510,368425)	16.6 (15.6,17.45)				Breast	88107 (68163,110341)	8.24 (6.37,10.33)		52869 (47359,56161)	17.17 (15.67,18.08)		13825 (12273,14645)	19.53 (17.85,20.47)		660925 (609171,707182)	14.55 (13.45,15.56)
	Cervical cancer	31796 (25834,39084)	6.98 (5.7,8.56)		6269 (5940,6473)	3.81 (3.65,3.91)		2702 (2579,2774)	6.04 (5.83,6.17)		211484 (195724,229841)	9.68 (8.97,10.51)				Cervical cancer	49841 (36878,64386)	4.64 (3.44,6)		7203 (6683,7552)	2.69 (2.54,2.8)		1315 (1207,1377)	2.2 (2.07,2.28)		296667 (272059,321906)	6.62 (6.07,7.18)
	Uterine cancer	10668 (7468,13302)	2.42 (1.74,3.01)		5673 (5148,5932)	2.95 (2.71,3.07)		1431 (1342,1478)	2.62 (2.48,2.7)		54849 (48804,59116)	2.6 (2.32,2.8)				Uterine cancer	13599 (9926,18596)	1.24 (0.91,1.7)		11886 (10618,12616)	3.65 (3.3,3.85)		2524 (2235,2678)	3.36 (3.03,3.54)		97672 (86516,108062)	2.11 (1.87,2.34)
	Ovarian cancer	11834 (8953,15233)	2.62 (2.02,3.35)		14473 (13450,15029)	8.1 (7.63,8.36)		5213 (4968,5346)	10.77 (10.37,11.01)		100584 (92971,109087)	4.73 (4.38,5.12)				Ovarian cancer	25144 (18526,32923)	2.3 (1.7,3.02)		17229 (15445,18196)	5.47 (4.98,5.75)		4765 (4276,5021)	6.79 (6.22,7.1)		185609 (167962,201013)	4.06 (3.67,4.4)
Prevalence															Prevalence
	Breast	819086 (685350,973902)	175.04 (147.34,206.19)		2091717 (1954147,2245625)	1250.48 (1181.17,1329.76)		457607 (423044,498440)	1039.65 (974.01,1118.18)		8689255 (8120449,9473540)	404.54 (377.02,439.95)				Breast	3748100 (3037651,4599349)	355.72 (287.01,437.27)		2965312 (2781117,3132935)	1037.51 (982.04,1090.96)		545211 (515406,572244)	909.79 (868.33,949.59)		20323179 (19248044,21451412)	450.64 (427.02,475.96)
	Cervical cancer	236676 (187658,294841)	44.62 (35.43,55.49)		196676 (192042,201216)	134.74 (131.71,137.92)		60306 (58474,62551)	192.49 (186.13,199.98)		1826379 (1726564,1929080)	78.15 (73.89,82.51)				Cervical cancer	746531 (532868,983076)	79.03 (56.34,103.91)		168649 (161934,175627)	84.75 (81.35,88.46)		26420 (25195,27753)	69.79 (66.35,73.52)		3384544 (3108399,3697258)	79.3 (72.81,86.58)
	Uterine cancer	163088 (110427,207414)	33.79 (23.16,42.75)		264362 (249894,272931)	158.7 (151.42,163.4)		38729 (37452,39727)	87.31 (84.68,89.44)		1333278 (1226415,1398593)	61.17 (56.35,64.14)				Uterine cancer	500659 (366795,698652)	46.52 (33.62,64.67)		753185 (705798,788143)	263.6 (249.17,274.94)		85175 (79503,88493)	142.51 (134.39,147.63)		3451750 (3165257,3724779)	75.73 (69.37,81.78)
	Ovarian cancer	82574 (54339,109792)	15.64 (10.62,20.74)		88469 (85248,90632)	57.45 (55.77,58.72)		27040 (26261,27562)	70.16 (68.57,71.41)		629090 (571666,693215)	27.62 (25.26,30.26)				Ovarian cancer	178170 (128935,236918)	18.67 (13.57,24.92)		96275 (91057,100149)	38.55 (36.91,40.06)		25728 (24261,26598)	49.69 (47.68,51.11)		1222425 (1102106,1332112)	28.08 (25.26,30.64)
Incidence															Incidence
	Breast	84793 (68417,103213)	17.84 (14.48,21.65)		202852 (192228,209178)	124.27 (118.99,127.73)		44435 (42563,45476)	103.9 (100.82,106.2)		865881 (824338,900794)	39.99 (38.01,41.6)				Breast	385838 (294095,489010)	37 (28.23,46.95)		269012 (248072,281855)	97 (91,101.29)		49177 (45511,51388)	83.71 (79.06,86.76)		2082737 (1940351,2225083)	46.4 (43.26,49.56)
	Cervical cancer	57843 (46321,71402)	11.8 (9.48,14.54)		30661 (29845,31412)	20.45 (19.91,20.92)		10378 (10086,10662)	30.45 (29.55,31.39)		409548 (383207,438506)	18.11 (16.94,19.4)				Cervical cancer	132788 (95959,172600)	13.37 (9.61,17.51)		27262 (26016,28397)	12.64 (12.16,13.16)		4373 (4166,4563)	10.33 (9.88,10.81)		667426 (613030,726422)	15.32 (14.08,16.68)
	Uterine cancer	26311 (18116,33312)	5.64 (3.94,7.1)		35089 (32936,36323)	20.56 (19.49,21.21)		5563 (5336,5717)	11.93 (11.55,12.24)		191291 (175003,201941)	8.87 (8.12,9.35)				Uterine cancer	72019 (53312,1e+05)	6.65 (4.91,9.25)		96331 (89629,100958)	33.14 (31.17,34.64)		11821 (10876,12343)	18.88 (17.63,19.61)		473614 (429916,513667)	10.36 (9.42,11.24)
	Ovarian cancer	19998 (14086,26191)	4.08 (2.97,5.31)		22244 (21008,22926)	13.38 (12.78,13.74)		7370 (7086,7535)	16.99 (16.5,17.3)		159096 (145709,174055)	7.22 (6.65,7.87)				Ovarian cancer	41236 (30302,54549)	4.05 (2.96,5.38)		25213 (23096,26470)	8.96 (8.37,9.34)		6679 (6126,6968)	11.09 (10.39,11.47)		298876 (270730,324501)	6.71 (6.07,7.28)
DALYs															DALYs
	Breast	1466486 (1177503,1798027)	301.68 (243.17,368.76)		1412061 (1344370,1477199)	894 (855.47,933.13)		448197 (432100,462096)	1076.5 (1045.04,1106.23)		11036402 (10434964,11671317)	503.81 (475.91,532.23)				Breast	2921096 (2254510,3716739)	281.54 (216.87,358.11)		1407343 (1309216,1504084)	522.4 (490.84,554.86)		317980 (294036,336501)	545.74 (514.6,574.24)		20254802 (18963376,21574429)	455.56 (426.64,485.3)
	Cervical cancer	1116204 (894263,1381046)	228.22 (183.51,282)		206382 (199285,213212)	136.5 (132.47,140.8)		78955 (76729,81190)	209.22 (204.08,215.84)		7416287 (6841378,8071400)	330.11 (304.67,359.1)				Cervical cancer	1547786 (1119815,2009230)	149.84 (108.94,195.58)		218344 (208376,228024)	94.2 (90.31,98.36)		36185 (34656,37594)	74.54 (71.94,77.38)		9911653 (9053317,10798306)	226.28 (206.51,246.86)
	Uterine cancer	345367 (227925,438108)	73.01 (49.39,91.9)		134949 (125759,142899)	76.76 (72.24,81.29)		31205 (29636,32539)	64.28 (61.57,67.02)		1501433 (1297885,1637756)	69.17 (59.85,75.3)				Uterine cancer	405490 (301127,553178)	37.86 (28.14,51.76)		302639 (279313,324074)	101.59 (94.33,109.05)		52041 (47556,55160)	79.4 (73.82,83.91)		2562943 (2291154,2846493)	56.15 (50.07,62.37)
	Ovarian cancer	402037 (288619,527089)	82.98 (60.96,108.14)		358420 (342698,368931)	220.55 (212.03,226.22)		127973 (124007,130712)	300.83 (293.19,306.47)		2909236 (2662221,3199426)	132.48 (121.34,145.63)				Ovarian cancer	750549 (545756,991110)	71.16 (51.75,94.42)		394812 (367615,412491)	139.93 (132.39,145.89)		100849 (93634,105103)	167.04 (158.11,172.85)		5163256 (4692423,5608304)	115.15 (104.58,125.21)
